# Supplementary material for: Engineering surface Mn-enriched species and regulating active oxygen species over LaMnO3 catalysts by synergistic modification of acid etching and potassium support for soot removal
Source: Royal Society of Chemistry journal article supplement (doi:10.1039/d2nj04144h), 2022-01-01
Supplement: d2nj04144h1.pdf [file d2nj04144h1.pdf]

1 **Engineering surface Mn-enriched and regulating active oxygen**  
2 **species over LaMnO<sub>3</sub> catalysts by synergistic modification of acid**  
3 **etching and potassium supported for soot removal**

4 Wenyue Dai <sup>a</sup>, Congcong Li <sup>a</sup>, Fang Wang <sup>b</sup>, Changsen Zhang <sup>a\*</sup>, Panpan Liu <sup>a</sup>,  
5 Haonan Qiao <sup>b</sup>, Zihan Li <sup>b</sup>

6 <sup>a</sup> School of Ecology & Environment, Zhengzhou University, Zhengzhou 450001,  
7 Henan, China

8 <sup>b</sup> College of Chemistry, Zhengzhou University, Zhengzhou 450001, Henan, China

9  
10

11 \*Corresponding author: Changsen Zhang

12 School of Ecology & Environment,

13 Zhengzhou University

14 Zhengzhou 450001, China

15 Email: [zhangcs@zzu.edu.cn](mailto:zhangcs@zzu.edu.cn)

16 Tel: +86 371 67781163

17 Fax: +86 371 67781163

18

19

20

21

22

23

24

25

26

27

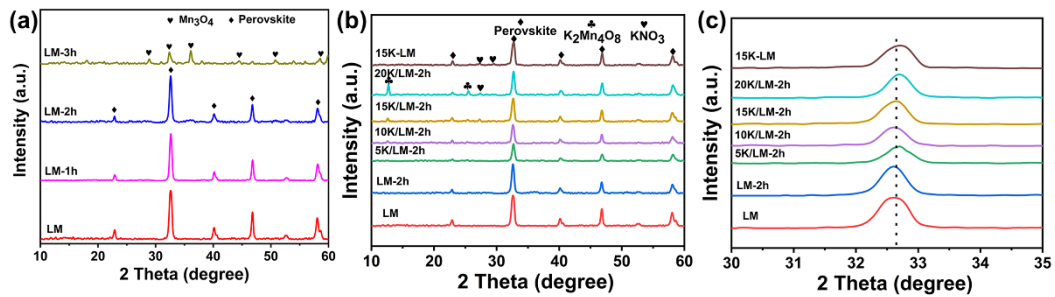

28

29 **Fig. S1** (a) XRD patterns of LM, LM-1h, LM-2h, and LM-3h; (b) XRD patterns of LM, LM-2h,

30 xK/LM-2h, and 15K/LM; (c) XRD patterns of characteristic peak amplification

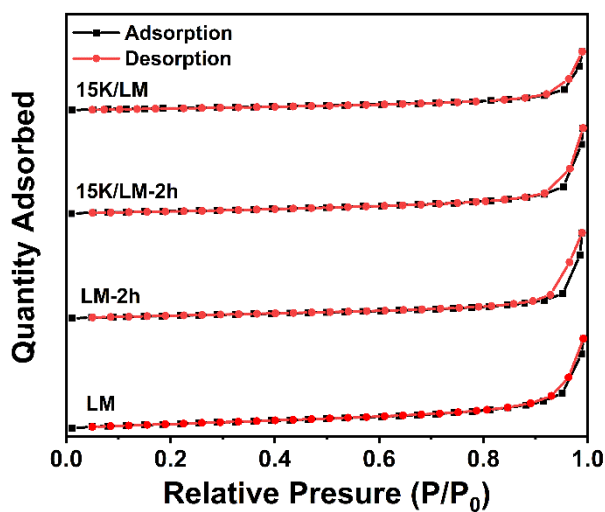

31

32 **Fig. S2** Nitrogen adsorption and desorption curves of LM, LM-2h, 15K/LM-2h, and 15K/LM

33

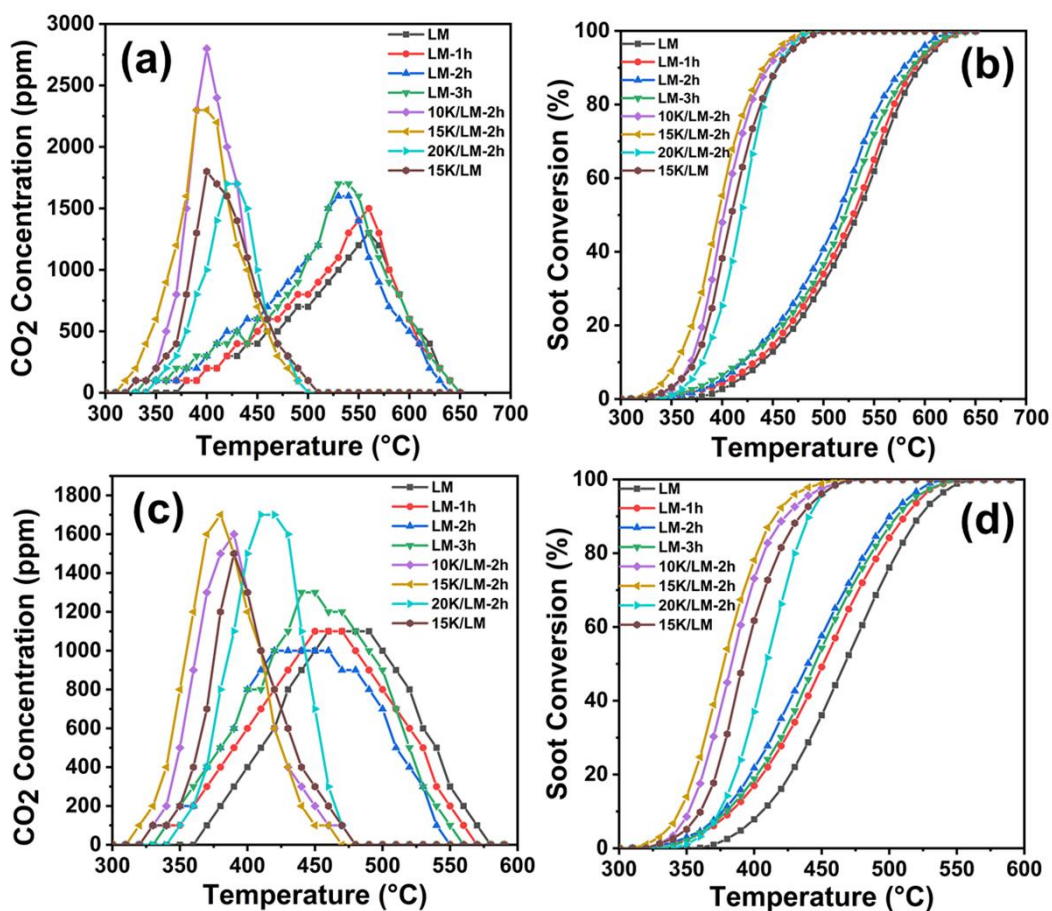

34

35 **Fig. S3** CO<sub>2</sub> concentration and total soot conversion of the as-prepared catalysts during TPO

36 under (a, b) loose contact condition without NO and (c, d) loose contact condition with NO

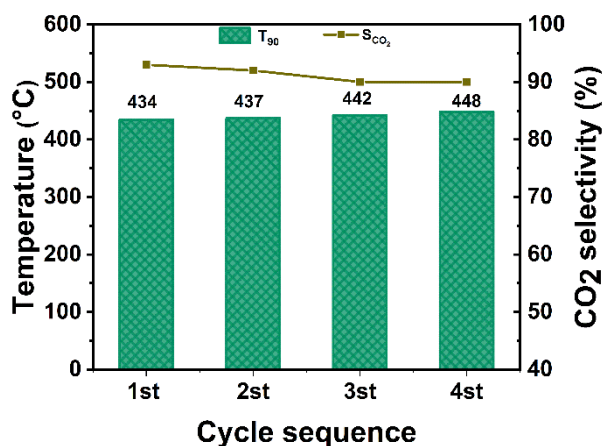

37

38 **Fig. S4** Stability tests of 15K/LM

39 In order to investigate the stability of catalysts, the 15K/LM was further examined by  
 40 reusing the catalyst in soot combustion 4 times under the presence of NO conditions.

41 As shown in Fig. S4, after cycles of 15K/LM, there is a fluctuation range with an

42 acceptable increase in the  $T_{90}$  in the catalyst's four cycles and the  $\text{CO}_2$  selectivity  
43 remained over 90%, which indicated the 15K/LM catalyst has good stability.

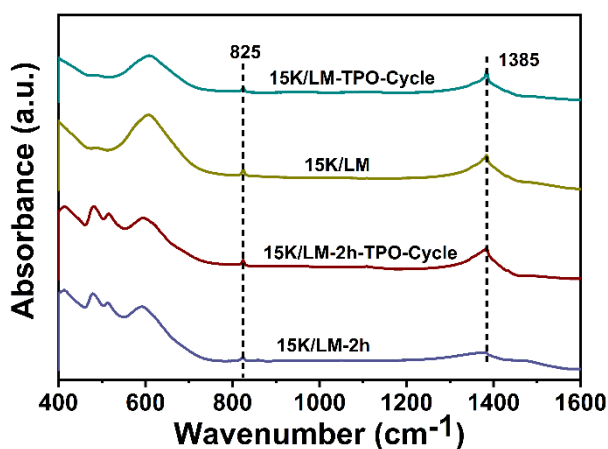

44

45 **Fig. S5** FT-IR spectra of 15K/LM-2h and 15K/LM catalysts and the reused catalyst.

46 In order to investigate whether  $\text{NO}^{3-}$  remains in 15K/LM and 15K/LM-2h samples  
47 after the cyclic TPO test, FT-IR tests were carried out on the catalysts, and the  
48 obtained curves were shown in Fig S5. For the 15K/LM-2h and 15K/LM samples, the  
49 two strong peaks at around  $1384\text{ cm}^{-1}$  and  $825\text{ cm}^{-1}$  could be observed, which are  
50 associated with the typical antisymmetric stretching mode of free  $\text{NO}^{3-}$  ions and the  
51 angular antisymmetric deformation of O–N–O respectively. Meanwhile, the peak of  
52  $\text{NO}^{3-}$  could still be observed after the TPO cycles. It is reported that in the presence of  
53 gas-phase  $\text{O}_2$ , the consumption and the regeneration of the active surface  $\text{NO}^{3-}$  groups  
54 can reach an equilibrium state quickly<sup>1,2</sup>.

55

56

57

58

59

60

61

62

63 **Table S1.** Catalytic performance of catalysts for soot combustion under loose contact with or  
 64 without NO

| Catalysts              | T <sub>10</sub> (°C) | T <sub>50</sub> (°C) | T <sub>90</sub> (°C) | S <sub>CO<sub>2</sub></sub> (%) |
|------------------------|----------------------|----------------------|----------------------|---------------------------------|
| blank                  | 523                  | 581                  | 621                  | 51                              |
| LM <sup>a</sup>        | 440                  | 533                  | 595                  | 97                              |
| LM-1h <sup>a</sup>     | 430                  | 530                  | 590                  | 97                              |
| LM-2h <sup>a</sup>     | 420                  | 514                  | 580                  | 98                              |
| LM-3h <sup>a</sup>     | 421                  | 521                  | 588                  | 97                              |
| 10K/LM-2h <sup>a</sup> | 370                  | 401                  | 445                  | 96                              |
| 15K/LM-2h <sup>a</sup> | 354                  | 397                  | 440                  | 96                              |
| 20K/LM-2h <sup>a</sup> | 380                  | 418                  | 454                  | 96                              |
| 15K/LM <sup>a</sup>    | 372                  | 408                  | 455                  | 95                              |
| LM <sup>b</sup>        | 406                  | 467                  | 524                  | 96                              |
| LM-1h <sup>b</sup>     | 383                  | 452                  | 516                  | 97                              |
| LM-2h <sup>b</sup>     | 377                  | 440                  | 500                  | 98                              |
| LM-3h <sup>b</sup>     | 380                  | 445                  | 506                  | 97                              |
| 10K/LM-2h <sup>b</sup> | 351                  | 383                  | 423                  | 93                              |
| 15K/LM-2h <sup>b</sup> | 344                  | 377                  | 416                  | 93                              |
| 20K/LM-2h <sup>b</sup> | 374                  | 406                  | 440                  | 93                              |
| 15K/LM <sup>b</sup>    | 360                  | 392                  | 434                  | 94                              |

65 <sup>a</sup> Reaction atmosphere: 5% O<sub>2</sub>, 10% H<sub>2</sub>O, 50 mL/min

66 <sup>b</sup> Reaction atmosphere: 5% O<sub>2</sub>, 500 ppm NO, 10% H<sub>2</sub>O, 50 mL/min

67 **Table S2.** The temperature for soot combustion with catalysts under tight contact conditions.

| Catalysts | T <sub>10</sub> (°C) | T <sub>50</sub> (°C) | T <sub>90</sub> (°C) | S <sub>CO<sub>2</sub></sub> (%) |
|-----------|----------------------|----------------------|----------------------|---------------------------------|
| LM        | 330                  | 381                  | 420                  | 97                              |
| LM-2h     | 296                  | 353                  | 394                  | 98                              |
| 15K/LM-2h | 276                  | 308                  | 327                  | 95                              |
| 15K/LM    | 290                  | 329                  | 360                  | 95                              |

68 Reaction atmosphere: 5% O<sub>2</sub>, 10% H<sub>2</sub>O, 50 mL/min

69

70

71

72

73

74

75

76

77

78 **Reference**

- 79 1. X. Feng, S. Zhang, R. Liu, J. Ma, X. Xu, J. Xu, X. Fang and X. Wang, *Phys*  
80 *Chem Chem Phys*, 2022, **24**, 3250-3258.
- 81 2. N. Feng, J. Meng, Y. Wu, C. Chen, L. Wang, L. Gao, H. Wan and G. Guan,  
82 *Catalysis Science & Technology*, 2016, **6**, 2930-2941.

83
